# Supplementary material for: Reactivity studies involving a Lewis base supported terminal uranium phosphinidene metallocene [η5-1,3-(Me3C)2C5H3]2U(P-2,4,6-iPr3C6H2)(OPMe3)
Source: Royal Society of Chemistry journal article supplement (doi:10.1039/d1dt00742d), 2021-01-01
Supplement: d1dt00742d1.pdf [file d1dt00742d1.pdf]

*Supporting Information for*

Reactivity Studies Involving a Lewis Base Supported  
Terminal Uranium Phosphinidene Metallocene [ $\eta^5$ -1,3-  
(Me<sub>3</sub>C)<sub>2</sub>C<sub>5</sub>H<sub>3</sub>]<sub>2</sub>U(=P-2,4,6-<sup>i</sup>Pr<sub>3</sub>C<sub>6</sub>H<sub>2</sub>)(OPMe<sub>3</sub>)

Deqiang Wang,<sup>a</sup> Shichun Wang,<sup>a</sup> Tongyu Li,<sup>a</sup> Yi Heng,<sup>a</sup> Guohua Hou,<sup>a</sup> Guofu Zi,<sup>\*a</sup> and Marc D. Walter<sup>\*b</sup>

<sup>a</sup>Department of Chemistry, Beijing Normal University, Beijing 100875, China

<sup>b</sup>Institut für Anorganische und Analytische Chemie, Technische Universität Braunschweig, Hagenring 30,  
38106 Braunschweig, Germany

**Table of contents**

|                                    |           |
|------------------------------------|-----------|
| <b>1. Figures</b>                  | <b>S2</b> |
| <b>2. Crystallographic details</b> | <b>S7</b> |

# 1. Figures

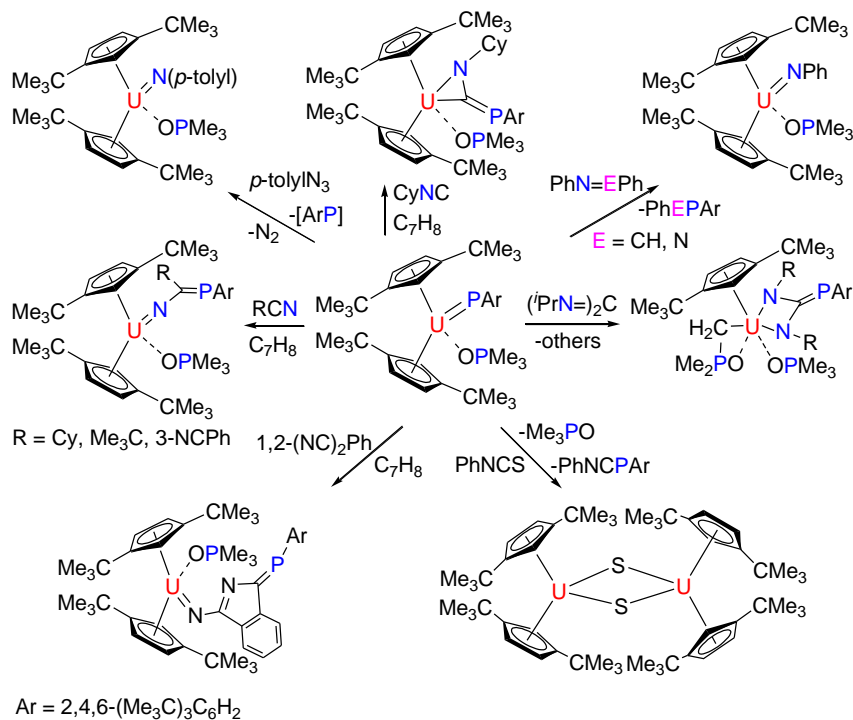

**Figure S1.** Selected reactivity of  $[\eta^5\text{-}1,3\text{-(Me}_3\text{C)}_2\text{C}_5\text{H}_3]_2\text{U(=P-}2,4,6\text{-}^t\text{Bu}_3\text{Ph)(OPMe}_3\text{)}$ .

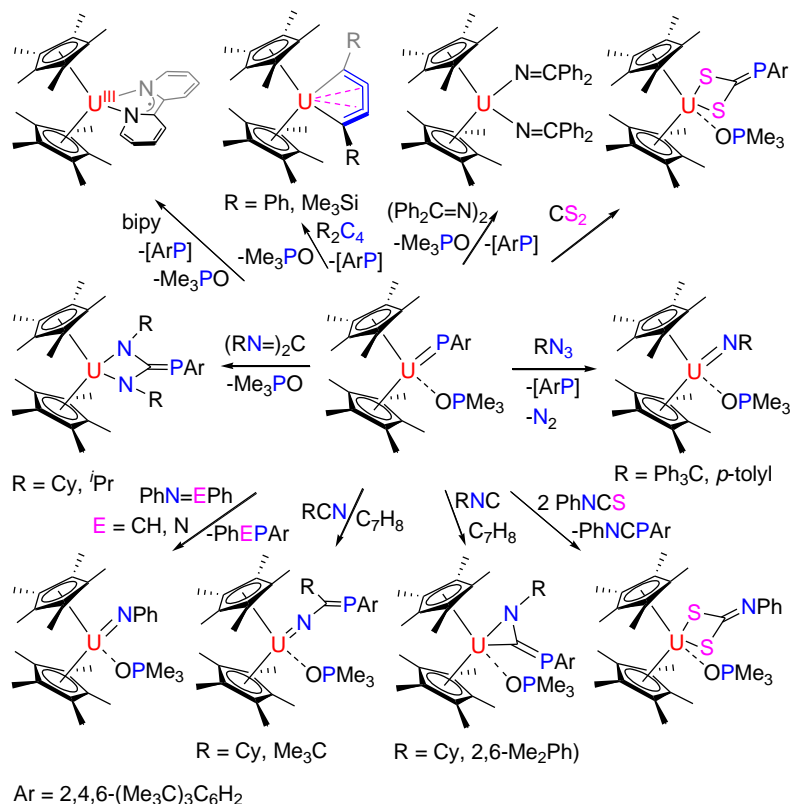

**Figure S2.** Selected reactivity of  $(\eta^5\text{-C}_5\text{Me}_5)_2\text{U(=P-}2,4,6\text{-}^t\text{Bu}_3\text{Ph)(OPMe}_3\text{)}$ .

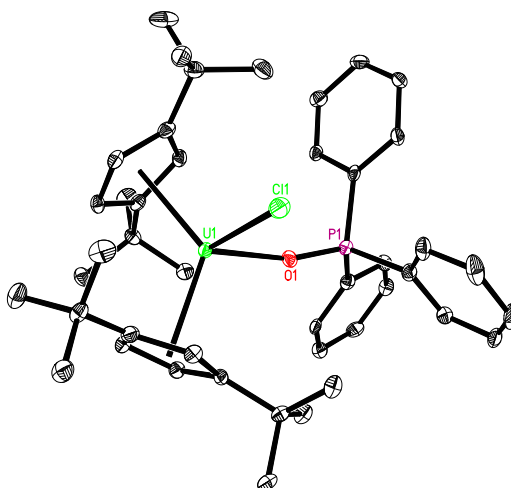

**Figure S3.** Molecular structure of **5** (thermal ellipsoids drawn at the 35% probability level).

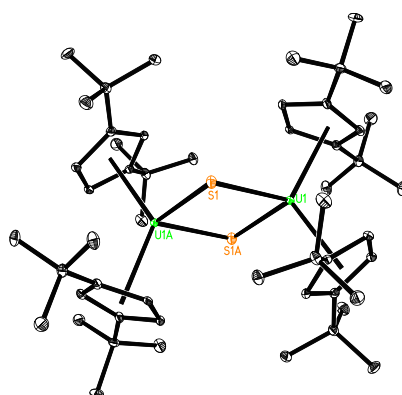

**Figure S4.** Molecular structure of **8** (thermal ellipsoids drawn at the 35% probability level). Selected bond lengths (Å) and angles (°): U-C(Cp) (av.) 2.774(4), U-C(Cp) (range) 2.707(4) to 2.827(4), U-Cp (cent) (av.) 2.523(4), U-S(1) 2.598(1), U-S(1A) 2.598(1), Cp(cent)-U-Cp(cent) 121.4(2), S(1)-U-S(1A) 85.5(1).

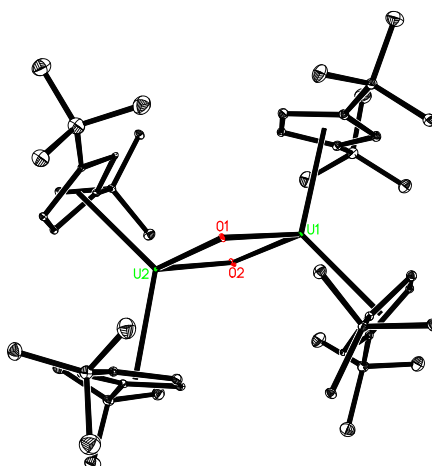

**Figure S5.** Molecular structure of **9** (thermal ellipsoids drawn at the 35% probability level). Selected bond lengths (Å) and angles (°): U-C(Cp) (av.) 2.801(6), U-C(Cp) (range) 2.720(6) to 2.859(6), U-Cp (cent) (av.) 2.528(6), U-O(1) 2.117(4), U-O(2) 2.128(4), Cp(cent)-U-Cp(cent) 123.8(2), O(1)-U-O(2) 73.7(2).

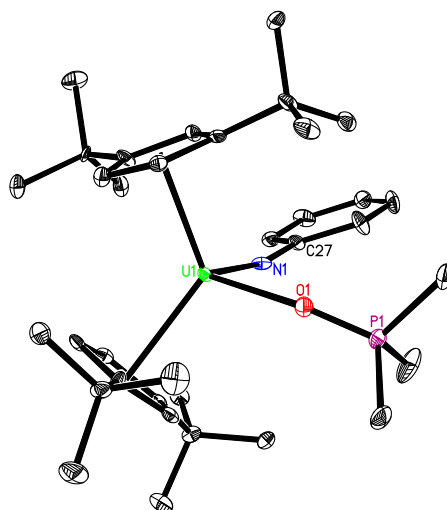

**Figure S6.** Molecular structure of **10** (thermal ellipsoids drawn at the 35% probability level). Selected bond lengths (Å) and angles (°): U-C(Cp) (av.) 2.807(9), U-C(Cp) (range) 2.760(9) to 2.860(9), U-Cp (cent) (av.) 2.534(9), U-N(1) 2.018(7), U-O(1) 2.381(6), Cp(cent)-U-Cp(cent) 120.9(2), N(1)-U-N(3) 93.2(3).

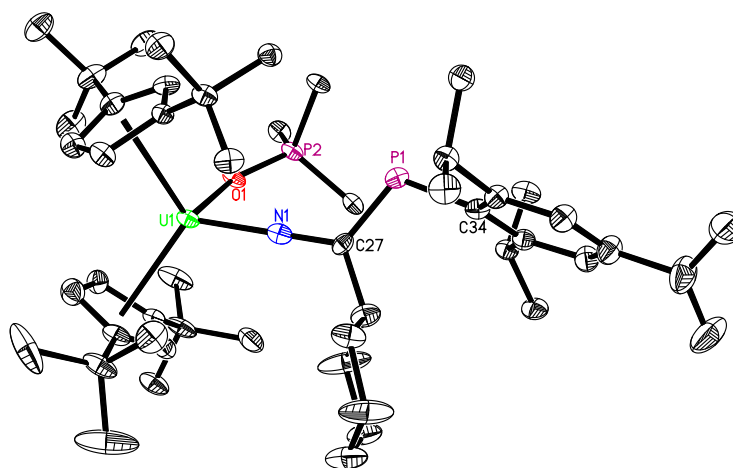

**Figure S7.** Molecular structure of **13** (thermal ellipsoids drawn at the 35% probability level).

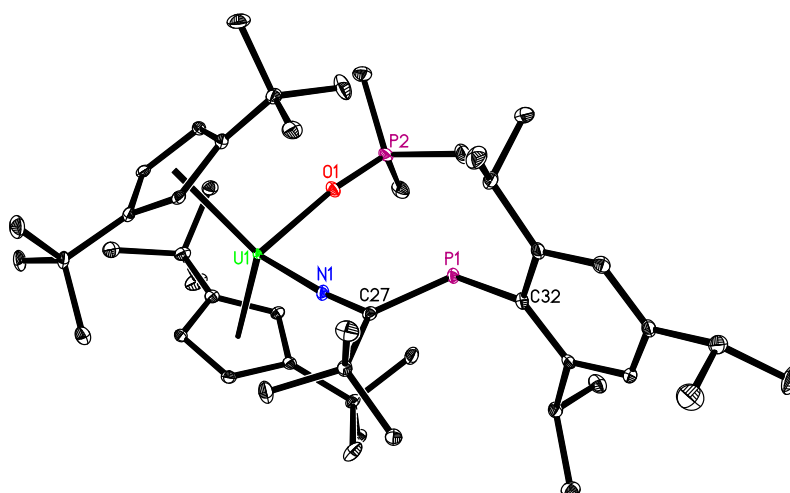

**Figure S8.** Molecular structure of **14** (thermal ellipsoids drawn at the 35% probability level).

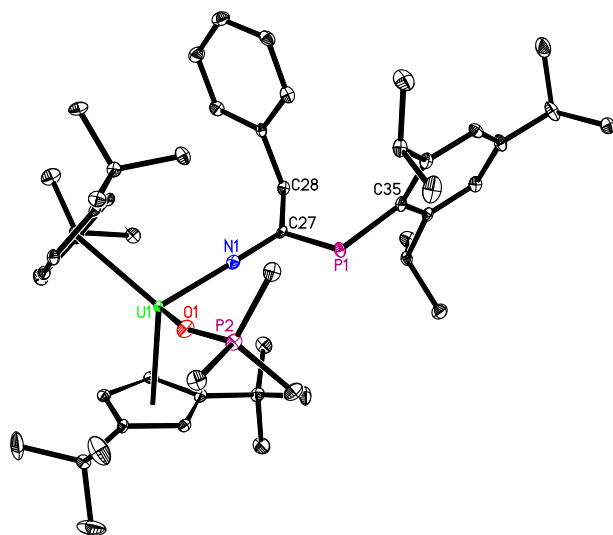

**Figure S9.** Molecular structure of **15** (thermal ellipsoids drawn at the 35% probability level).

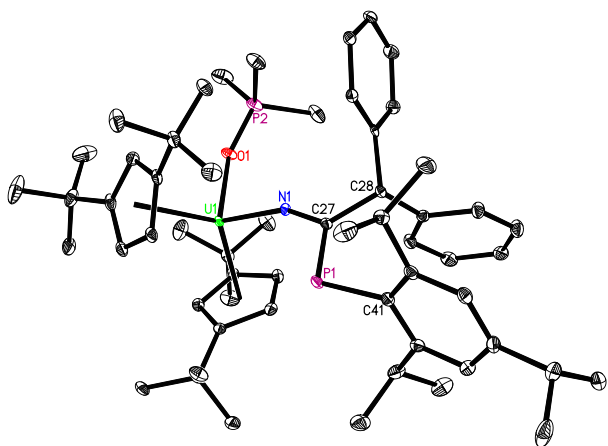

**Figure S10.** Molecular structure of **16** (thermal ellipsoids drawn at the 35% probability level).

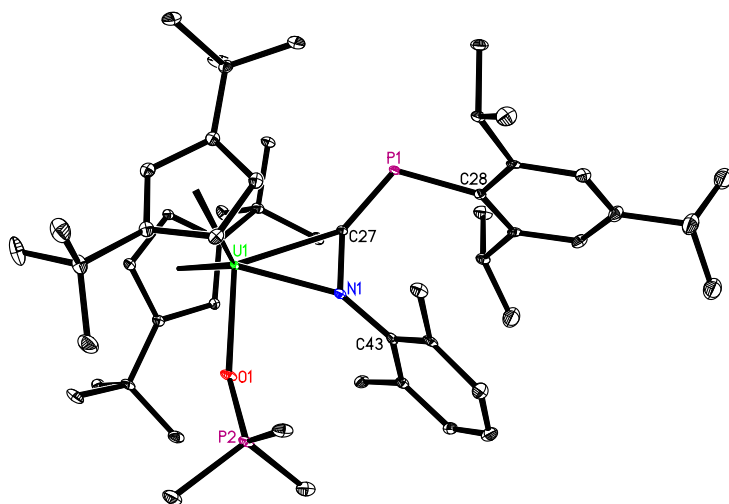

**Figure S11.** Molecular structure of **19** (thermal ellipsoids drawn at the 35% probability level).

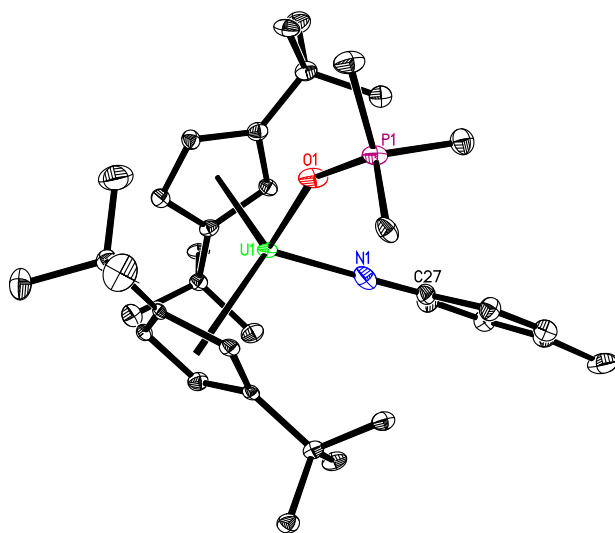

**Figure S12.** Molecular structure of **21** (thermal ellipsoids drawn at the 35% probability level). Selected bond lengths (Å) and angles (°): U-C(Cp) (av.) 2.813(14), U-C(Cp) (range) 2.764(14) to 2.857(13), U-Cp (cent) (av.) 2.543(14), U-N(1) 2.017(15), U-O(1) 2.366(9), Cp(cent)-U-Cp(cent) 123.2(4), N(1)-U-O(1) 92.0(5).

## 2. Crystallographic details

**Table S1. Crystal Data and Experimental Parameters for Compounds 2-5 and 7**

| Compound                                                      | <b>2</b>                                          | <b>3</b>                              | <b>4</b>                                          | <b>5</b>                              | <b>7</b>                                                         |
|---------------------------------------------------------------|---------------------------------------------------|---------------------------------------|---------------------------------------------------|---------------------------------------|------------------------------------------------------------------|
| Formula                                                       | C <sub>44</sub> H <sub>74</sub> OP <sub>2</sub> U | C <sub>29</sub> H <sub>51</sub> ClOPU | C <sub>44</sub> H <sub>75</sub> OP <sub>2</sub> U | C <sub>44</sub> H <sub>57</sub> ClOPU | C <sub>45</sub> H <sub>74</sub> OP <sub>2</sub> S <sub>2</sub> U |
| Fw                                                            | 919.00                                            | 720.14                                | 920.01                                            | 906.34                                | 995.13                                                           |
| crystal system                                                | triclinic                                         | monoclinic                            | triclinic                                         | monoclinic                            | monoclinic                                                       |
| space group                                                   | <i>P</i> (-1)                                     | <i>P</i> 2 <sub>1</sub> / <i>c</i>    | <i>P</i> (-1)                                     | <i>P</i> 2 <sub>1</sub> / <i>c</i>    | <i>P</i> 2 <sub>1</sub> / <i>c</i>                               |
| <i>a</i> (Å)                                                  | 11.247(1)                                         | 10.301(1)                             | 11.251(1)                                         | 12.347(1)                             | 15.280(1)                                                        |
| <i>b</i> (Å)                                                  | 13.893(1)                                         | 11.966(1)                             | 14.129(1)                                         | 14.211(1)                             | 13.768(1)                                                        |
| <i>c</i> (Å)                                                  | 15.359(1)                                         | 29.155(1)                             | 15.855(1)                                         | 22.653(1)                             | 25.981(1)                                                        |
| $\alpha$ (deg)                                                | 77.53(1)                                          | 90                                    | 75.74(1)                                          | 90                                    | 90                                                               |
| $\beta$ (deg)                                                 | 76.19(1)                                          | 90.58(1)                              | 75.71(1)                                          | 95.04(1)                              | 100.72(1)                                                        |
| $\gamma$ (deg)                                                | 75.64(1)                                          | 90                                    | 70.89(1)                                          | 90                                    | 90                                                               |
| <i>V</i> (Å <sup>3</sup> )                                    | 2226.10(18)                                       | 3593.41(9)                            | 2269.78(18)                                       | 3959.52(15)                           | 5370.41(16)                                                      |
| <i>Z</i>                                                      | 2                                                 | 4                                     | 2                                                 | 4                                     | 4                                                                |
| <i>D</i> <sub>calc</sub> (g/cm <sup>3</sup> )                 | 1.371                                             | 1.331                                 | 1.346                                             | 1.520                                 | 1.231                                                            |
| $\mu$ (Mo/K $\alpha$ ) <sub>calc</sub> (cm <sup>-1</sup> )    | 11.147                                            | 13.922                                | 10.932                                            | 12.771                                | 9.988                                                            |
| size (mm)                                                     | 0.20 × 0.20 × 0.20                                | 0.22 × 0.20 × 0.20                    | 0.20 × 0.15 × 0.15                                | 0.15 × 0.10 × 0.10                    | 0.25 × 0.20 × 0.20                                               |
| <i>F</i> (000)                                                | 936                                               | 1428                                  | 938                                               | 1812                                  | 2024                                                             |
| 2 $\theta$ range (deg)                                        | 8.20 to 144.27                                    | 7.99 to 146.82                        | 8.08 to 146.53                                    | 7.19 to 146.58                        | 7.29 to 146.67                                                   |
| no. of reflns,<br>collected                                   | 15665                                             | 14337                                 | 15817                                             | 16232                                 | 22019                                                            |
| no of obsd reflns                                             | 8521                                              | 7007                                  | 8808                                              | 7706                                  | 10456                                                            |
| no of variables                                               | 448                                               | 344                                   | 458                                               | 445                                   | 481                                                              |
| abscorr ( <i>T</i> <sub>max</sub> , <i>T</i> <sub>min</sub> ) | 1.00, 0.28                                        | 1.00, 0.20                            | 1.00, 0.74                                        | 1.00, 0.95                            | 1.00, 0.58                                                       |
| <i>R</i>                                                      | 0.036                                             | 0.028                                 | 0.033                                             | 0.039                                 | 0.031                                                            |
| <i>R</i> <sub>w</sub>                                         | 0.088                                             | 0.072                                 | 0.078                                             | 0.081                                 | 0.073                                                            |
| <i>R</i> <sub>all</sub>                                       | 0.040                                             | 0.030                                 | 0.036                                             | 0.056                                 | 0.033                                                            |
| Gof                                                           | 1.04                                              | 1.05                                  | 1.03                                              | 1.01                                  | 1.06                                                             |
| CCDC                                                          | 2043085                                           | 2043084                               | 2043082                                           | 2043083                               | 2043090                                                          |

**Table S2. Crystal Data and Experimental Parameters for Compounds 8-12**

| Compound                                                      | <b>8</b> C <sub>6</sub> H <sub>6</sub>                        | <b>9</b>                                                      | <b>10</b>                            | <b>11</b> 2C <sub>6</sub> H <sub>6</sub>                                        | <b>12</b>                                          |
|---------------------------------------------------------------|---------------------------------------------------------------|---------------------------------------------------------------|--------------------------------------|---------------------------------------------------------------------------------|----------------------------------------------------|
| Formula                                                       | C <sub>58</sub> H <sub>90</sub> S <sub>2</sub> U <sub>2</sub> | C <sub>52</sub> H <sub>84</sub> O <sub>2</sub> U <sub>2</sub> | C <sub>35</sub> H <sub>56</sub> NOPU | C <sub>62</sub> H <sub>104</sub> N <sub>4</sub> O <sub>2</sub> P <sub>4</sub> U | C <sub>51</sub> H <sub>79</sub> NOP <sub>2</sub> U |
| Fw                                                            | 1327.47                                                       | 1217.25                                                       | 775.80                               | 1299.40                                                                         | 1022.12                                            |
| crystal system                                                | triclinic                                                     | triclinic                                                     | monoclinic                           | monoclinic                                                                      | triclinic                                          |
| space group                                                   | <i>P</i> (-1)                                                 | <i>P</i> (-1)                                                 | <i>P</i> 2 <sub>1</sub> / <i>n</i>   | <i>C</i> 2/ <i>c</i>                                                            | <i>P</i> (-1)                                      |
| <i>a</i> (Å)                                                  | 10.450(1)                                                     | 10.634(1)                                                     | 12.970(1)                            | 19.940(1)                                                                       | 11.667(1)                                          |
| <i>b</i> (Å)                                                  | 10.809(1)                                                     | 12.116(1)                                                     | 18.103(1)                            | 11.201(1)                                                                       | 15.266(1)                                          |
| <i>c</i> (Å)                                                  | 14.090(1)                                                     | 30.283(1)                                                     | 14.668(1)                            | 31.836(1)                                                                       | 15.515(1)                                          |
| $\alpha$ (deg)                                                | 102.13(1)                                                     | 94.38(1)                                                      | 90                                   | 90                                                                              | 91.56(1)                                           |
| $\beta$ (deg)                                                 | 105.06(1)                                                     | 97.42(1)                                                      | 95.73(1)                             | 104.18(1)                                                                       | 101.18(1)                                          |
| $\gamma$ (deg)                                                | 107.47(1)                                                     | 105.27(1)                                                     | 90                                   | 90                                                                              | 105.64(1)                                          |
| <i>V</i> (Å <sup>3</sup> )                                    | 1392.50(9)                                                    | 3707.4(2)                                                     | 3426.83(18)                          | 6893.96(19)                                                                     | 2601.23(10)                                        |
| <i>Z</i>                                                      | 1                                                             | 3                                                             | 4                                    | 4                                                                               | 2                                                  |
| <i>D</i> <sub>calc</sub> (g/cm <sup>3</sup> )                 | 1.583                                                         | 1.636                                                         | 1.504                                | 1.252                                                                           | 1.305                                              |
| $\mu$ (Mo/K $\alpha$ ) <sub>calc</sub> (cm <sup>-1</sup> )    | 17.179                                                        | 18.558                                                        | 13.953                               | 7.802                                                                           | 9.601                                              |
| size (mm)                                                     | 0.15 × 0.10 × 0.10                                            | 0.20 × 0.15 × 0.15                                            | 0.20 × 0.10 × 0.10                   | 0.10 × 0.10 × 0.10                                                              | 0.22 × 0.20 × 0.20                                 |
| <i>F</i> (000)                                                | 654                                                           | 1788                                                          | 1552                                 | 2688                                                                            | 1044                                               |
| 2 $\theta$ range (deg)                                        | 6.84 to 146.36                                                | 7.61 to 144.21                                                | 7.78 to 144.25                       | 9.12 to 143.93                                                                  | 8.03 to 146.76                                     |
| no. of reflns,<br>collected                                   | 9560                                                          | 26527                                                         | 13003                                | 13953                                                                           | 18305                                              |
| no of obsd reflns                                             | 5400                                                          | 14188                                                         | 6534                                 | 6609                                                                            | 10143                                              |
| no of variables                                               | 292                                                           | 787                                                           | 367                                  | 343                                                                             | 526                                                |
| abscorr ( <i>T</i> <sub>max</sub> , <i>T</i> <sub>min</sub> ) | 1.00, 0.70                                                    | 1.00, 0.26                                                    | 1.00, 0.19                           | 1.00, 0.84                                                                      | 1.00, 0.63                                         |
| <i>R</i>                                                      | 0.024                                                         | 0.052                                                         | 0.049                                | 0.026                                                                           | 0.021                                              |
| <i>R</i> <sub>w</sub>                                         | 0.058                                                         | 0.139                                                         | 0.127                                | 0.062                                                                           | 0.052                                              |
| <i>R</i> <sub>all</sub>                                       | 0.027                                                         | 0.057                                                         | 0.062                                | 0.027                                                                           | 0.022                                              |
| Gof                                                           | 1.05                                                          | 1.08                                                          | 1.08                                 | 1.06                                                                            | 1.03                                               |
| CCDC                                                          | 2043100                                                       | 2043098                                                       | 2043097                              | 2043089                                                                         | 2043086                                            |



**Table S3. Crystal Data and Experimental Parameters for Compounds 13-17**

| Compound                                                      | <b>13</b>                                          | <b>14</b>                                          | <b>15</b> C <sub>6</sub> H <sub>6</sub>            | <b>16</b>                                          | <b>17</b> C <sub>6</sub> H <sub>6</sub>                          |
|---------------------------------------------------------------|----------------------------------------------------|----------------------------------------------------|----------------------------------------------------|----------------------------------------------------|------------------------------------------------------------------|
| Formula                                                       | C <sub>51</sub> H <sub>85</sub> NOP <sub>2</sub> U | C <sub>49</sub> H <sub>83</sub> NOP <sub>2</sub> U | C <sub>58</sub> H <sub>87</sub> NOP <sub>2</sub> U | C <sub>58</sub> H <sub>85</sub> NOP <sub>2</sub> U | C <sub>58</sub> H <sub>84</sub> N <sub>2</sub> OP <sub>2</sub> U |
| Fw                                                            | 1028.16                                            | 1002.13                                            | 1114.25                                            | 1112.23                                            | 1125.24                                                          |
| crystal system                                                | triclinic                                          | triclinic                                          | triclinic                                          | triclinic                                          | triclinic                                                        |
| space group                                                   | <i>P</i> (-1)                                                    |
| <i>a</i> (Å)                                                  | 11.606(1)                                          | 11.356(1)                                          | 12.586(1)                                          | 11.262(1)                                          | 10.546(1)                                                        |
| <i>b</i> (Å)                                                  | 15.480(1)                                          | 13.680(1)                                          | 13.482(1)                                          | 12.890(1)                                          | 16.111(1)                                                        |
| <i>c</i> (Å)                                                  | 15.806(1)                                          | 17.553(1)                                          | 17.716(1)                                          | 20.103(1)                                          | 17.255(1)                                                        |
| $\alpha$ (deg)                                                | 92.42(1)                                           | 71.81(1)                                           | 88.64(1)                                           | 101.40(1)                                          | 97.18(1)                                                         |
| $\beta$ (deg)                                                 | 101.44(1)                                          | 79.05(1)                                           | 88.14(1)                                           | 105.08(1)                                          | 101.00(1)                                                        |
| $\gamma$ (deg)                                                | 106.28(1)                                          | 89.35(1)                                           | 66.66(1)                                           | 93.69(1)                                           | 104.74(1)                                                        |
| <i>V</i> (Å <sup>3</sup> )                                    | 2657.10(14)                                        | 2540.2(3)                                          | 2758.48(15)                                        | 2741.27(12)                                        | 2736.20(13)                                                      |
| <i>Z</i>                                                      | 2                                                  | 2                                                  | 2                                                  | 2                                                  | 2                                                                |
| <i>D</i> <sub>calc</sub> (g/cm <sup>3</sup> )                 | 1.285                                              | 1.310                                              | 1.342                                              | 1.347                                              | 1.366                                                            |
| $\mu$ (Mo/K $\alpha$ ) <sub>calc</sub> (cm <sup>-1</sup> )    | 9.400                                              | 9.818                                              | 9.100                                              | 9.157                                              | 9.186                                                            |
| size (mm)                                                     | 0.25 × 0.15 × 0.15                                 | 0.25 × 0.20 × 0.20                                 | 0.25 × 0.20 × 0.20                                 | 0.20 × 0.20 × 0.20                                 | 0.20 × 0.10 × 0.10                                               |
| <i>F</i> (000)                                                | 1056                                               | 1028                                               | 1144                                               | 1140                                               | 1152                                                             |
| 2 $\theta$ range (deg)                                        | 3.85 to 146.86                                     | 6.81 to 144.05                                     | 7.14 to 144.25                                     | 7.54 to 144.24                                     | 7.09 to 144.07                                                   |
| no. of reflns,<br>collected                                   | 18901                                              | 18481                                              | 19743                                              | 20261                                              | 19818                                                            |
| no of obsd reflns                                             | 10311                                              | 9733                                               | 10577                                              | 10521                                              | 10479                                                            |
| no of variables                                               | 526                                                | 511                                                | 620                                                | 589                                                | 597                                                              |
| abscorr ( <i>T</i> <sub>max</sub> , <i>T</i> <sub>min</sub> ) | 1.00, 0.51                                         | 1.00, 0.20                                         | 1.00, 0.17                                         | 1.00, 0.60                                         | 1.00, 0.31                                                       |
| <i>R</i>                                                      | 0.042                                              | 0.027                                              | 0.035                                              | 0.029                                              | 0.046                                                            |
| <i>R</i> <sub>w</sub>                                         | 0.099                                              | 0.070                                              | 0.091                                              | 0.076                                              | 0.115                                                            |
| <i>R</i> <sub>all</sub>                                       | 0.046                                              | 0.028                                              | 0.036                                              | 0.031                                              | 0.051                                                            |
| Gof                                                           | 1.03                                               | 1.04                                               | 1.04                                               | 1.05                                               | 1.03                                                             |
| CCDC                                                          | 2043087                                            | 2043095                                            | 2043088                                            | 2043091                                            | 2043096                                                          |

**Table S4. Crystal Data and Experimental Parameters for Compounds 18-21**

| Compound                                                      | 18                                                 | 19                                                 | 20                                                 | 21                                   |
|---------------------------------------------------------------|----------------------------------------------------|----------------------------------------------------|----------------------------------------------------|--------------------------------------|
| Formula                                                       | C <sub>51</sub> H <sub>85</sub> NOP <sub>2</sub> U | C <sub>53</sub> H <sub>83</sub> NOP <sub>2</sub> U | C <sub>44</sub> H <sub>74</sub> NOP <sub>2</sub> U | C <sub>36</sub> H <sub>58</sub> NOPU |
| Fw                                                            | 1028.16                                            | 1050.17                                            | 933.01                                             | 789.83                               |
| crystal system                                                | triclinic                                          | monoclinic                                         | monoclinic                                         | triclinic                            |
| space group                                                   | <i>P</i> (-1)                                      | <i>P</i> 2 <sub>1</sub> / <i>c</i>                 | <i>P</i> 2 <sub>1</sub> / <i>n</i>                 | <i>P</i> (-1)                        |
| <i>a</i> (Å)                                                  | 11.752(1)                                          | 15.553(1)                                          | 10.994(1)                                          | 14.784(1)                            |
| <i>b</i> (Å)                                                  | 13.649(1)                                          | 16.812(1)                                          | 27.269(1)                                          | 15.469(1)                            |
| <i>c</i> (Å)                                                  | 18.397(1)                                          | 21.001(1)                                          | 15.125(1)                                          | 16.204(1)                            |
| $\alpha$ (deg)                                                | 102.13(1)                                          | 90                                                 | 90                                                 | 106.61(1)                            |
| $\beta$ (deg)                                                 | 96.59(1)                                           | 106.74(1)                                          | 90.18(1)                                           | 96.41(1)                             |
| $\gamma$ (deg)                                                | 108.99(1)                                          | 90                                                 | 90                                                 | 94.75(1)                             |
| <i>V</i> (Å <sup>3</sup> )                                    | 2674.04(11)                                        | 5258.50(11)                                        | 4534.12(6)                                         | 3503.3(3)                            |
| <i>Z</i>                                                      | 2                                                  | 4                                                  | 4                                                  | 4                                    |
| <i>D</i> <sub>calc</sub> (g/cm <sup>3</sup> )                 | 1.277                                              | 1.326                                              | 1.367                                              | 1.498                                |
| $\mu$ (Mo/K $\alpha$ ) <sub>calc</sub> (cm <sup>-1</sup> )    | 9.340                                              | 9.513                                              | 10.961                                             | 13.659                               |
| size (mm)                                                     | 0.22 × 0.20 × 0.20                                 | 0.20 × 0.20 × 0.20                                 | 0.25 × 0.20 × 0.20                                 | 0.10 × 0.10 × 0.10                   |
| <i>F</i> (000)                                                | 1056                                               | 2152                                               | 1900                                               | 1584                                 |
| 2 $\theta$ range (deg)                                        | 7.10 to 146.76                                     | 7.93 to 144.15                                     | 8.67 to 144.69                                     | 6.97 to 144.28                       |
| no. of reflns, collected                                      | 19244                                              | 20189                                              | 30427                                              | 25957                                |
| no of obsd reflns                                             | 10417                                              | 10088                                              | 8686                                               | 13410                                |
| no of variables                                               | 526                                                | 539                                                | 463                                                | 741                                  |
| abscorr ( <i>T</i> <sub>max</sub> , <i>T</i> <sub>min</sub> ) | 1.00, 0.55                                         | 1.00, 0.30                                         | 1.00, 0.42                                         | 1.00, 0.26                           |
| <i>R</i>                                                      | 0.025                                              | 0.030                                              | 0.024                                              | 0.085                                |
| <i>R</i> <sub>w</sub>                                         | 0.060                                              | 0.079                                              | 0.061                                              | 0.217                                |
| <i>R</i> <sub>all</sub>                                       | 0.027                                              | 0.032                                              | 0.025                                              | 0.107                                |
| Gof                                                           | 1.02                                               | 1.06                                               | 1.11                                               | 1.03                                 |
| CCDC                                                          | 2043093                                            | 2043092                                            | 2043094                                            | 2043099                              |
